# Supplementary material
Source: PubMed Central journal article supplement (PMC4491298)
Supplement: CJN.11091114_CJN11091114SupplementaryData.pdf [file CJN.11091114_CJN11091114SupplementaryData.pdf]

## Supplementary material

### Search strategy developed in MEDLINE

Searched via Ovid interface.

Database: Ovid MEDLINE (1946 onwards)

Search strategy:

1. qualitative\*.mp. [mp=title, abstract, original title, name of substance word, subject heading word, keyword heading word, protocol supplementary concept, rare disease supplementary concept, unique identifier]; 143984
2. findings\*.mp. [mp=title, abstract, original title, name of substance word, subject heading word, keyword heading word, protocol supplementary concept, rare disease supplementary concept, unique identifier]; 1253309
3. interviews\*.mp. [mp=title, abstract, original title, name of substance word, subject heading word, keyword heading word, protocol supplementary concept, rare disease supplementary concept, unique identifier];110513
4. renal fail\*.mp. [mp=title, abstract, original title, name of substance word, subject heading word, keyword heading word, protocol supplementary concept, rare disease supplementary concept, unique identifier]; 71444
5. renal failure.mp. or exp Renal Insufficiency;/150987
6. chronic kidney disease.mp. or exp Renal Insufficiency, Chronic;/ 89455
7. end stage renal failure.mp. or exp Kidney Failure, Chronic;/80091
8. exp Renal Insufficiency, Chronic/ or exp Renal Insufficiency;/122641
9. exp Peritoneal Dialysis, Continuous Ambulatory/ or renal replacement therapy.mp. or exp Renal Dialysis/ or exp Renal Replacement Therapy/ or exp Peritoneal Dialysis;/171090
10. exp Renal Dialysis/ or exp Dialysis/ or exp Peritoneal Dialysis, Continuous Ambulatory/ or exp Peritoneal Dialysis/ or dialysis.mp.;140995
11. haemodialysis\*.mp.;11422
12. peritoneal dialysis\*.mp.; 25875
13. dialysis\*.mp.; 130563
14. Hemodialysis, Home/ or home dialysis\*.mp.; 1841
15. active treatment.mp.; 6915
16. life prolonging treatment\*.mp.; 225
17. conservative management\*.mp.; 8572
18. conserve manage\*.mp.; 1
19. dialysis withdrawal\*.mp. or exp Treatment Refusal;/ 10797
20. withdrawal\*.mp.; 76979
21. exp Palliative Care/ or exp Hospices/ or palliative care\*.mp. or exp Patient Care Team/ or exp Terminal Care;/ 128459

22. exp Informed Consent/ or exp Patient Participation/ or exp Choice Behavior/ or exp Decision Making/ or patient choice\*.mp. or exp Patient Satisfaction/; 219893
23. exp "Patient Acceptance of Health Care"/ or exp Patient Preference/ or patient preference\*.mp.; 168350
24. decision mak\*.mp.; 123085
25. shared decision making.mp.; 1942
26. patient choice\*.mp.; 1106
27. patient acceptance of health care.mp.; 31467
28. patient participation.mp.; 18459
29. choice behaviour.mp.; 151
30. physician patient relationship.mp.; 1434
31. patient education.mp. or Patient Education as Topic/; 78811
32. exp Cooperative Behavior/ or cooperative behaviour.mp.; 28136
33. decision support techniques.mp. or exp Decision Support Techniques/; 61347
34. patient acceptance of health care.mp.; 31467
35. Communication Aids for Disabled/ or Communication/ or Health Communication/ or Interdisciplinary Communication/ or Communication Barriers/; 77785
36. communication\*.mp. [mp=title, abstract, original title, name of substance word, subject heading word, keyword heading word, protocol supplementary concept, rare disease supplementary concept, unique identifier]; 232413
37. factor\*.mp.; 3975126
38. exp Physicians/ or physician choice\*.mp.; 86039
39. Physician's Role/ or physicians.mp. or Physician's Practice Patterns/; 276660
40. nephrologist.mp.; 1383
41. nephrologist choice\*.mp.; 0
42. Kidney/ or Nephrology/ or nephrology\*.mp.; 237891
43. Interprofessional Relations/ or Health Personnel/ or Patient Care Team/ or healthcare team\*.mp.; 111644
44. 4 or 5 or 6 or 7 or 8; 157755
45. 9 or 10 or 11 or 12 or 13 or 14 or 15 or 16 or 17 or 18 or 19 or 20 or 21; 441387
46. 22 or 23 or 24 or 25 or 26 or 27 or 28 or 29 or 30 or 31 or 32 or 33 or 34 or 35 or 36 or 37 or 38 or 39 or 40 or 41 or 42 or 43; 4952898
47. 1 or 2 or 3; 1441794
48. limit 44 to (english language and humans and yr="1985 -Current" and "all adult (19 plus years)" and english and humans); 61846
49. limit 45 to (english language and humans and yr="1985" and "all adult (19 plus years)" and english and humans); 2093
50. limit 46 to (english language and humans and yr="1985" and "all adult (19 plus years)" and english and humans); 14232

51. limit 47 to (english language and humans and yr="1985" and "all adult (19 plus years)" and english and humans); 5191
52. 48 and 49 and 50; 135
